# Supplementary material for: Stimuli-responsive hyperbranched poly(amidoamine)s integrated with thermal and pH sensitivity, reducible degradability and intrinsic photoluminescence
Source: Royal Society of Chemistry journal article supplement (doi:10.1039/c6ra27390d), 2017-01-01
Supplement: c6ra27390d1.pdf [file c6ra27390d1.pdf]

## *Supporting Information*

# Stimuli-responsive hyperbranched poly(amidoamine)s integrated with thermal and pH sensitivity, reducible degradability and intrinsic photoluminescence

Chen Zhan,<sup>a</sup> Xiao-Bin Fu,<sup>b</sup> Yefeng Yao,<sup>b</sup> Hua-Ji Liu<sup>\*a</sup> and Yu Chen<sup>\*a</sup>

<sup>a</sup> Tianjin Key Laboratory of Molecular Optoelectronic Science, Department of Chemistry, School of Sciences, Tianjin University, and Collaborative Innovation Center of Chemical Science and Engineering (Tianjin), Tianjin 300354, People's Republic of China

<sup>b</sup> Department of Physics & Shanghai Key Laboratory of Magnetic Resonance, East China Normal University, North Zhongshan Road 3663, Shanghai 200062, People's Republic of China

Corresponding author, Tel.: +86-22-27403475; fax: +86-22-27403475

E-mail: liuhuaji@tju.edu.cn, [chenyu@tju.edu.cn](mailto:chenyu@tju.edu.cn)

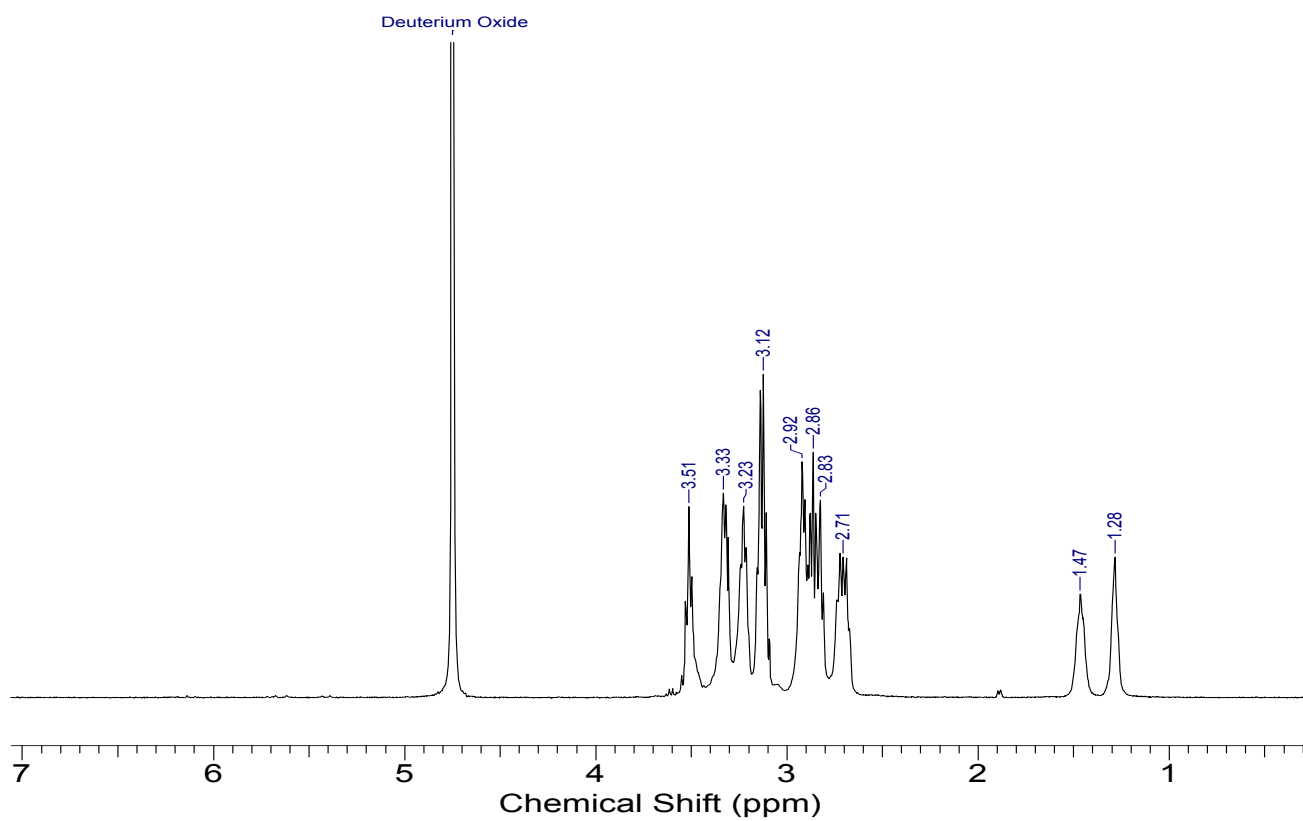

**Fig. S1** Typical  $^1\text{H}$  NMR full spectrum of  $\text{HPA}\cdot\text{HCl}$  (HPA-S50 as the sample)

(X) in A-50 HCl

Chemical structure of the polymer repeat unit is shown above the spectrum:

$$\text{-(CH}_2\text{CH}_2\text{CONHCH}_2\text{CH}_2\text{CH}_2\text{CH}_2\text{CH}_2\text{CH}_2\text{NHOCCH}_2\text{CH}_2\text{NHCH}_2\text{CH}_2\text{NCH}_2\text{CH}_2\text{NH-)}_n$$

The structure is divided into two regions: HMBA (left) and TAEA (right).

**HMBA Region (3.5 to 2.5 ppm):**

- Peak **e** at 3.33 ppm (integral 3.99)
- Peak **d** at 3.15 ppm (integral 17.44)
- Peak **c** at 2.70 ppm (integral 3.91)

**TAEA Region (1.5 to 1.2 ppm):**

- Peak **b** at 1.47 ppm (integral 3.98)
- Peak **a** at 1.29 ppm (integral 4.00)

Chemical Shift (ppm)

Chemical structure of the copolymer is shown above the spectrum:

$$\text{-CH}_2^{\text{b}}\text{CH}_2^{\text{a}}\text{CONHCH}_2^{\text{d}}\text{CH}_2^{\text{c}}\text{SSCH}_2^{\text{c}}\text{CH}_2^{\text{d}}\text{NHOCCCH}_2^{\text{a}}\text{CH}_2^{\text{b}}\text{NHCH}_2\text{CH}_2\text{NCH}_2\text{CH}_2\text{NH-}$$

The spectrum shows peaks assigned to the protons in the structure:

- Peak d:** ~3.53 ppm (integral 4.00)
- Peak c:** ~3.36 ppm (integral 3.97)
- Peak b:** ~3.25 ppm (integral 4.01)
- Peak a:** ~3.14 ppm (integral 3.02)
- Peak c, TAEA unit:** ~3.14 ppm (integral 3.02)
- Peak b, c, TAEA unit:** ~3.14 ppm (integral 3.02)
- Peak a:** ~2.94 ppm (integral 4.00)
- Peak b:** ~2.88 ppm (integral 3.98)
- Peak c:** ~2.85 ppm (integral 4.10)
- Peak a:** ~2.75 ppm (integral 4.08)

**Fig. S2** Assignments of  $^1\text{H}$  NMR signals of  $\text{HPA} \cdot \text{HCl}$  ( $\text{HPA-S0}$  and  $\text{HPA-S100}$  as the representatives)

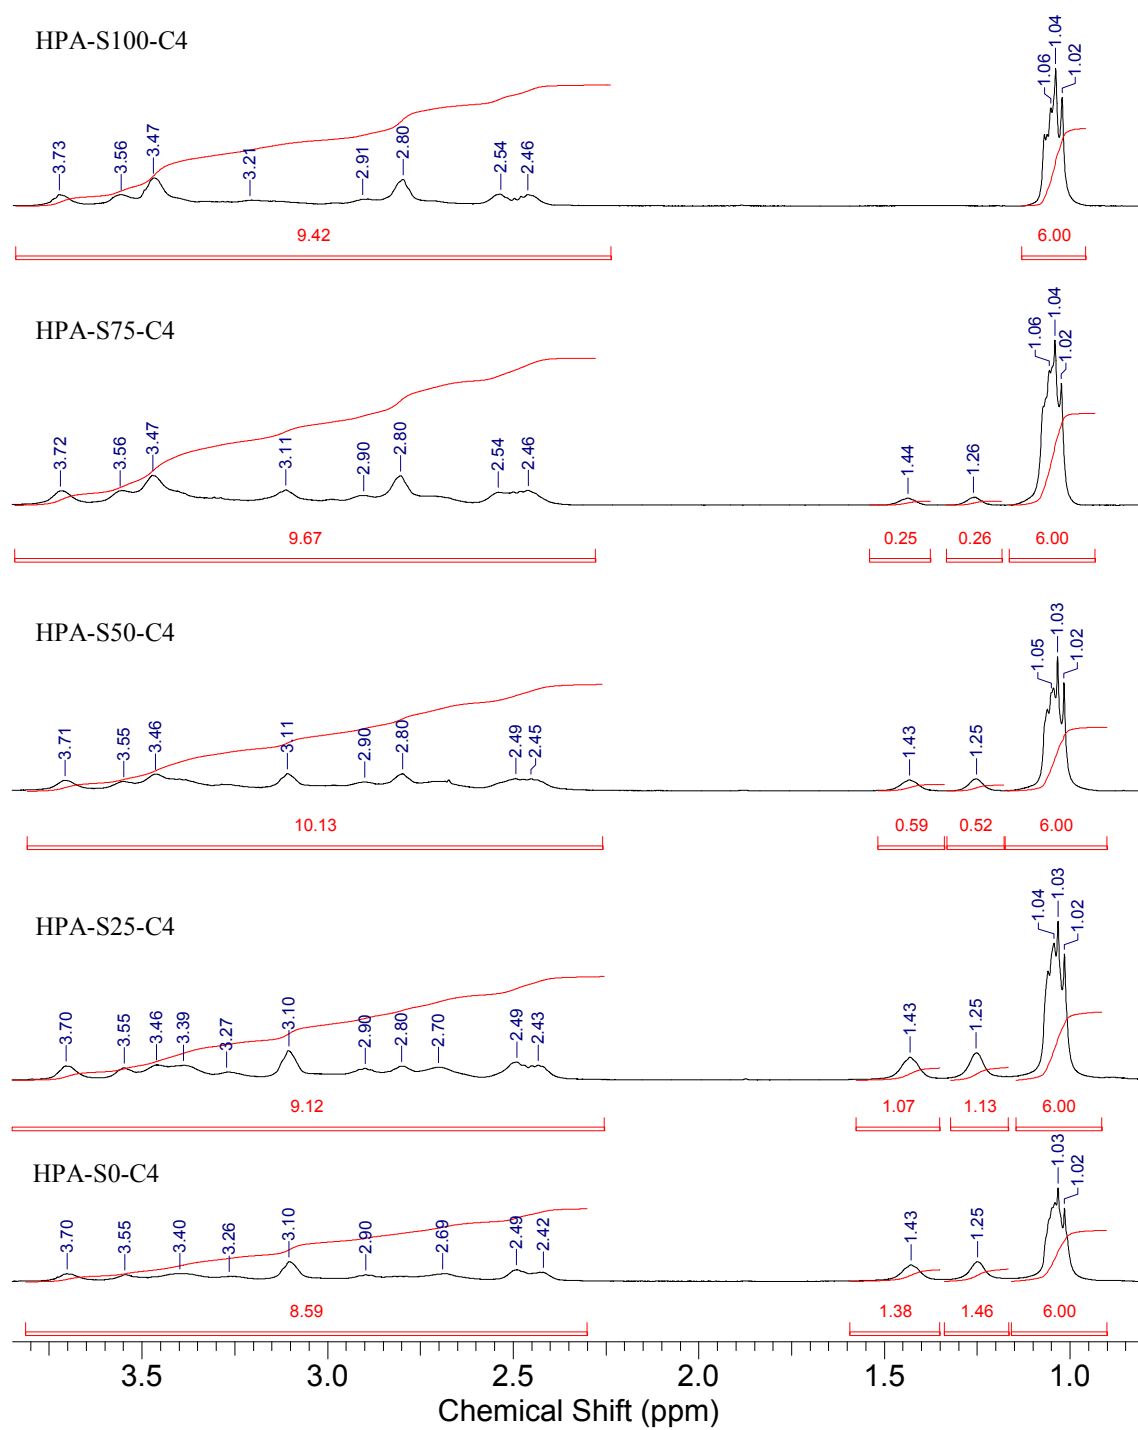

**Fig. S3**  $^1\text{H}$  NMR spectra of HPA-C4s

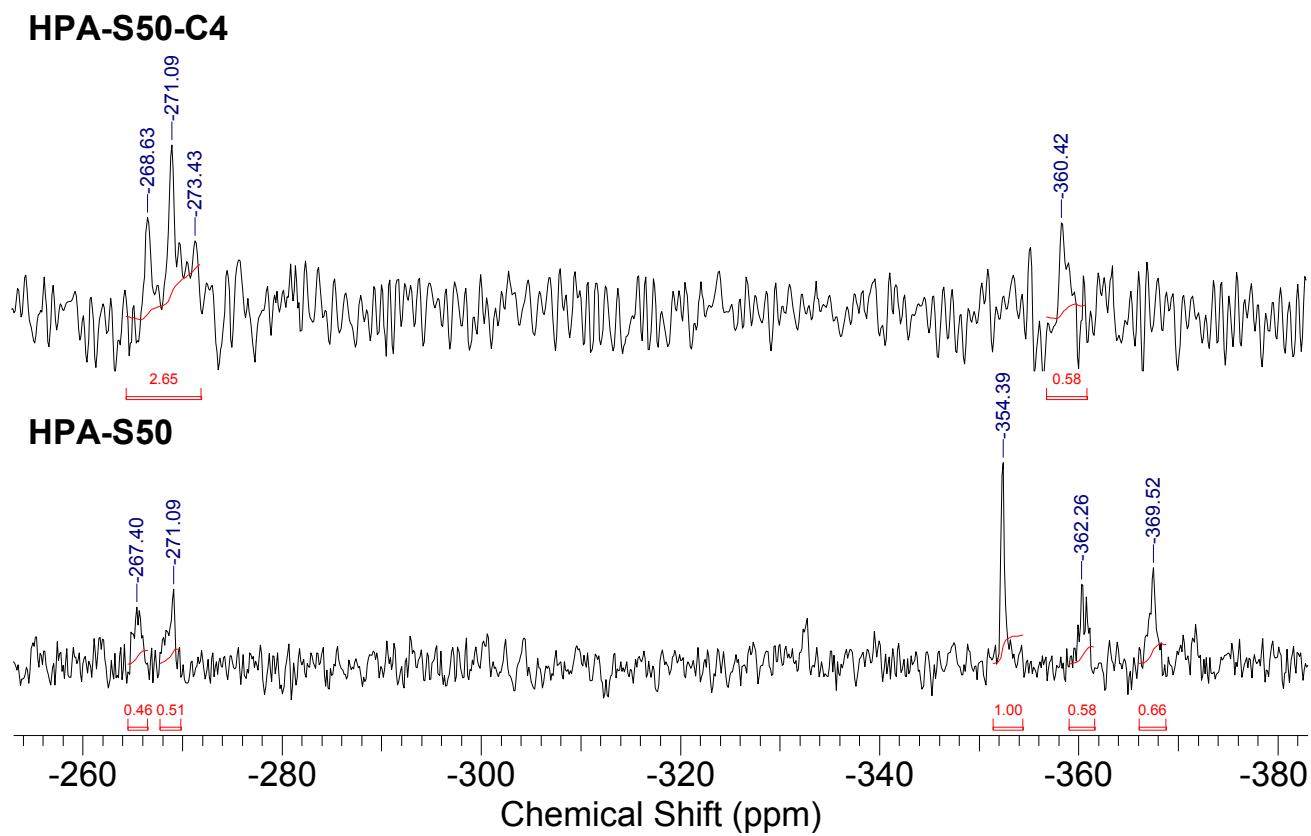

**Fig. S4** Comparison of the  $^{15}\text{N}$  NMR spectra of HPAs and HPA-C4s

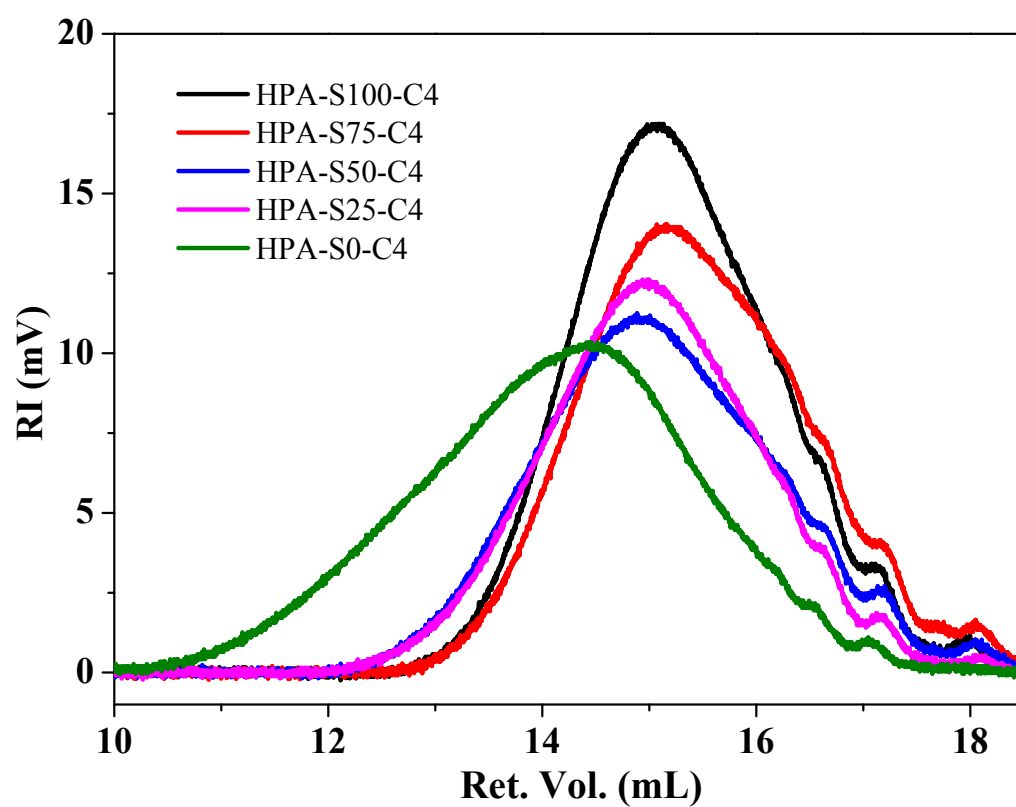

Fig. S5 GPC diagrams of HPA-C4s

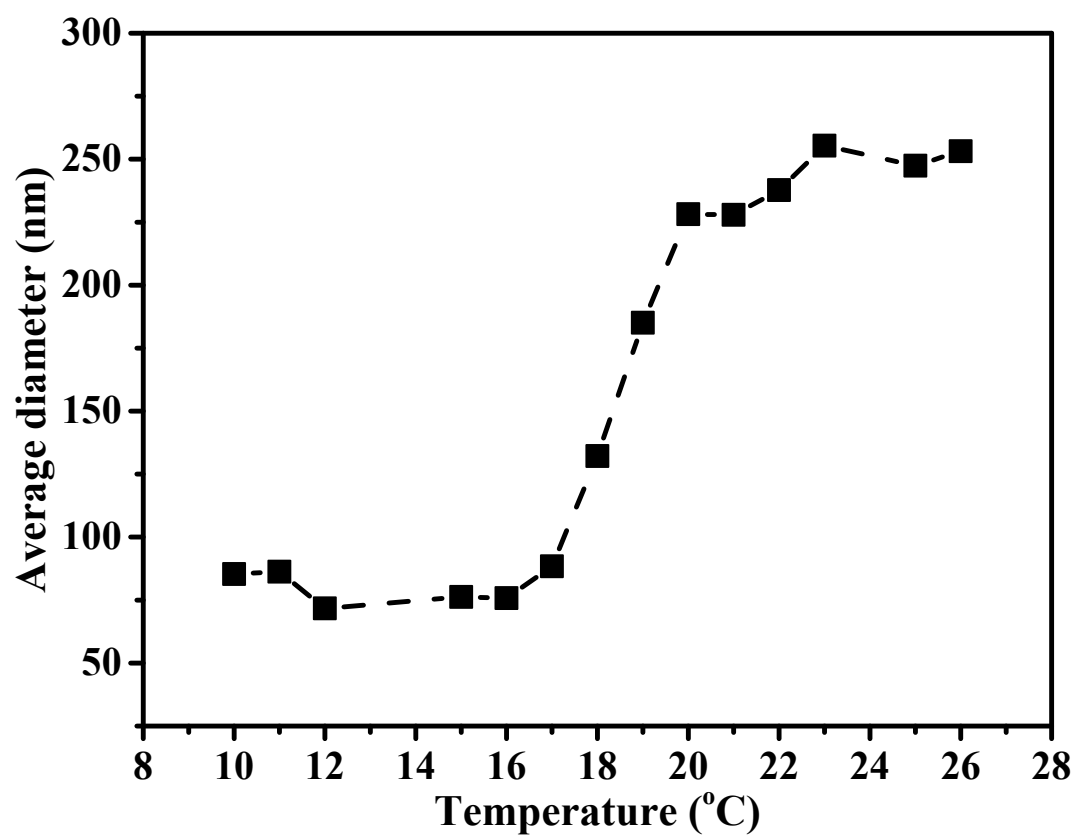

**Fig. S6** Temperature-dependent DLS curve of HPA-C4 aqueous solution (polymer concentration is 5 mg/mL).

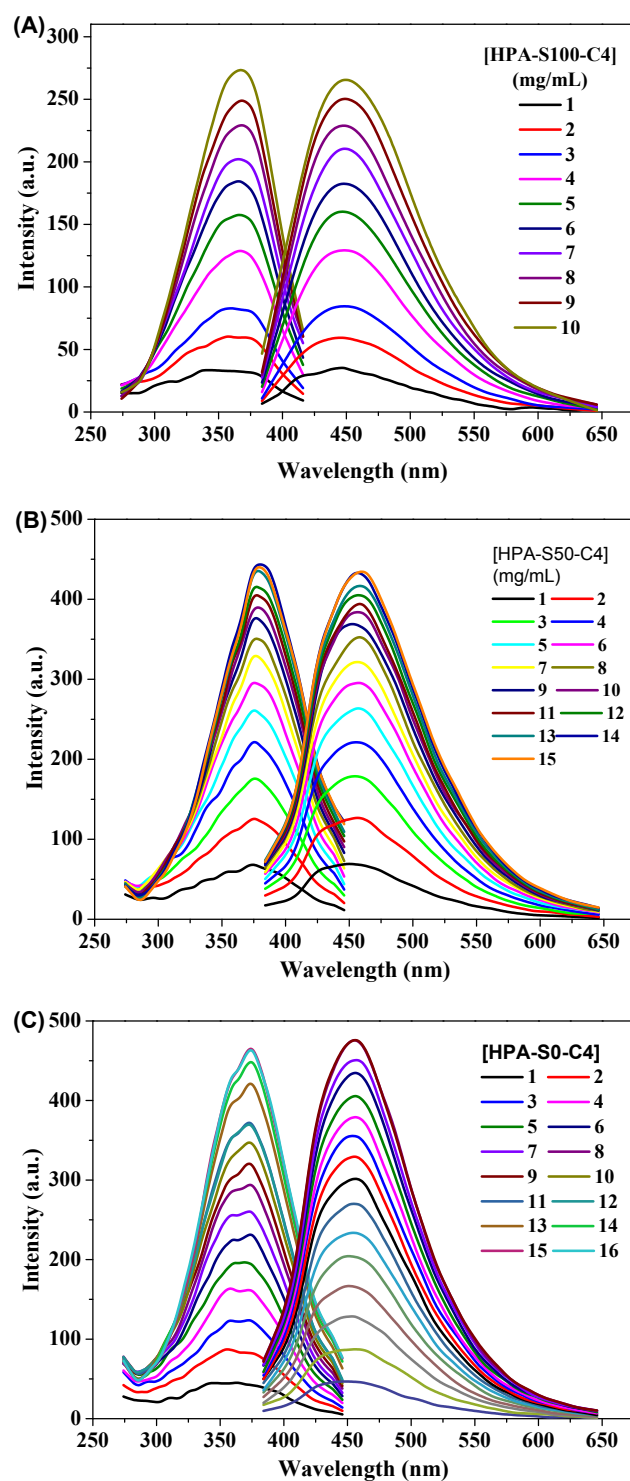

**Fig. S7** Typical fluorescence excitation and emission spectra of (A) HPA-S100-C4, (B) HPA-S50-C4 and (C) HPA-S0-C4 in water with different concentration (slit widths of excitation and emission are set to be 10 nm and 10 nm, respectively)



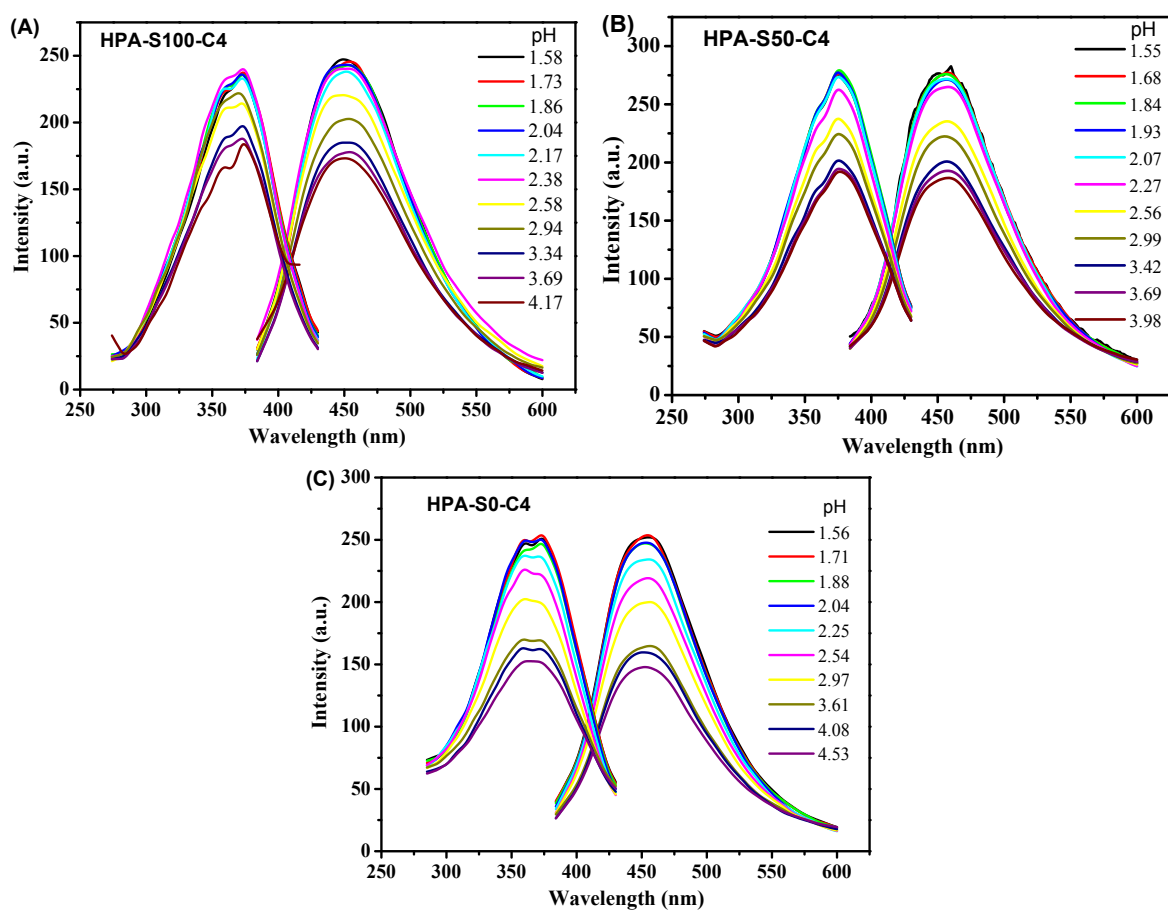

**Fig. S8** Typical fluorescence excitation and emission spectra of (A) HPA-S100-C4, (B) HPA-S50-C4 and (C) HPA-S0-C4 in water with different pH (polymer concentration is 5 mg/mL; slit widths of excitation and emission are set to be 10 nm and 10 nm, respectively)

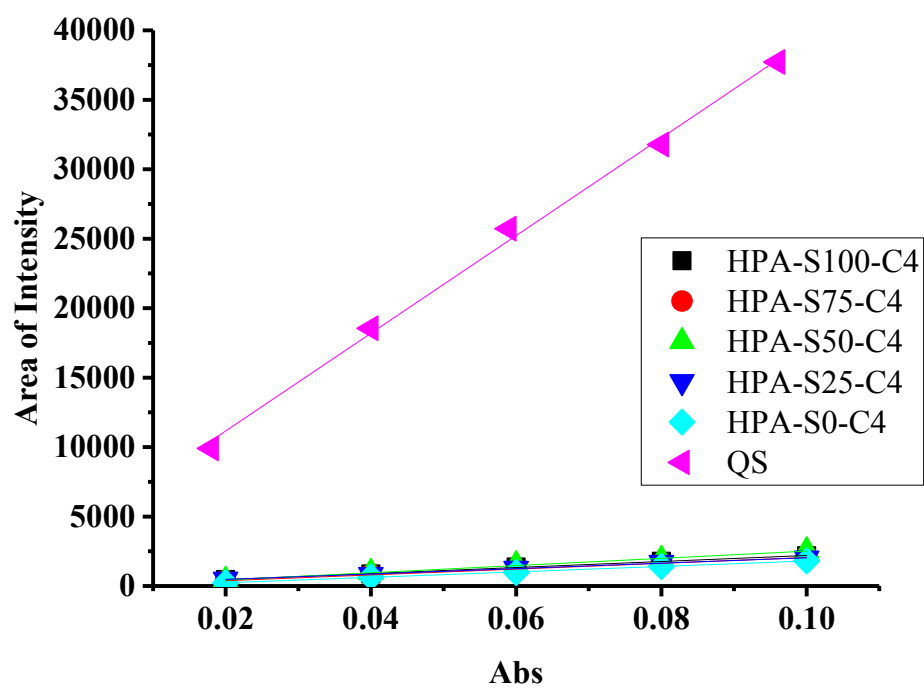

**Fig. S9** Quantum yield measurements

|        | S100 | S75  | S50  | S25  | S0   |
|--------|------|------|------|------|------|
| QY (%) | 11.4 | 11.0 | 13.7 | 10.3 | 10.3 |

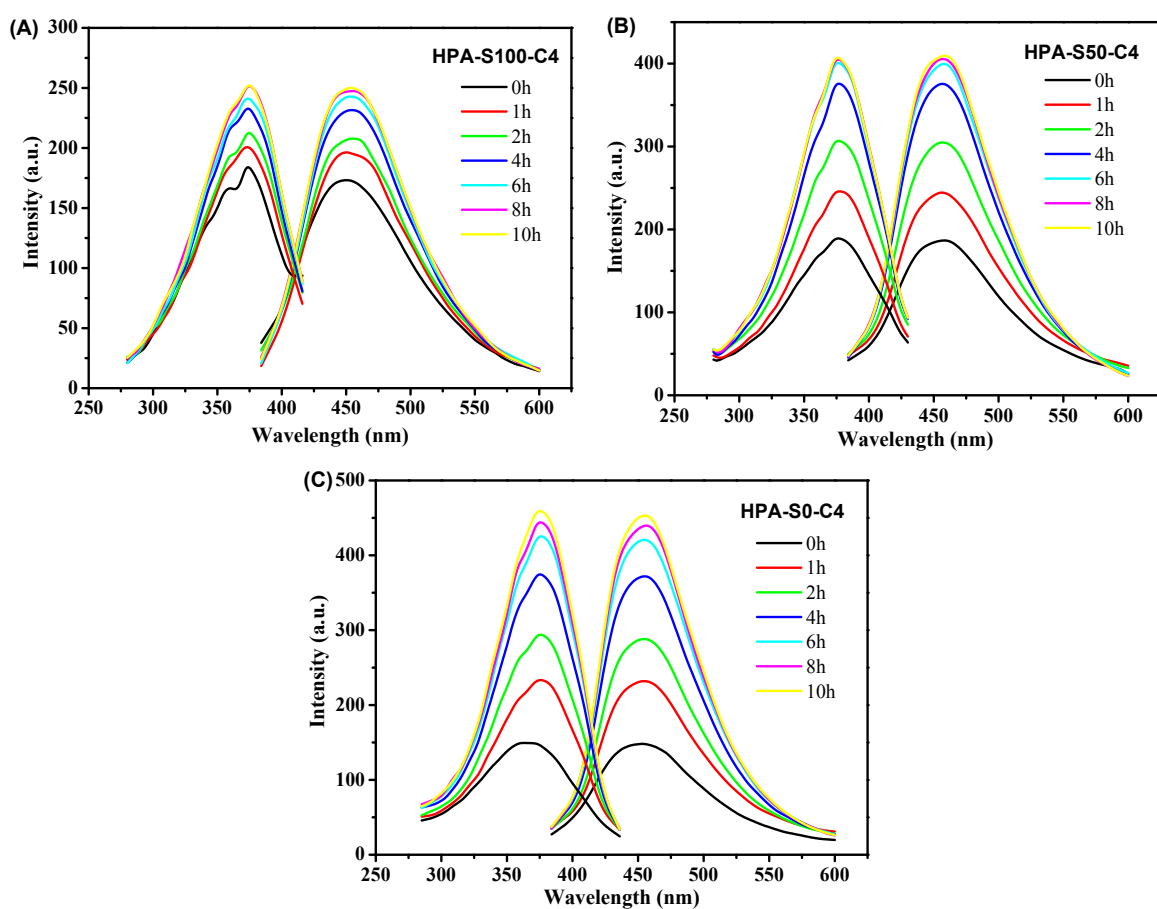

**Fig. S10** Typical fluorescence excitation and emission spectra of (A) HPA-S100-C4, (B) HPA-S50-C4 and (C) HPA-S0-C4 in water oxidized by air for different time (polymer concentration is 5 mg/mL; slit widths of excitation and emission are set to be 10 nm and 10 nm, respectively)
